# Supplementary material for: Hydrogenated Cu2O\Au@CeO2 Z-scheme catalyst for photocatalytic oxidation of amines to imines
Source: Royal Society of Chemistry journal article supplement (doi:10.1039/c8cy01689e), 2018-01-01
Supplement: c8cy01689e1.pdf [file c8cy01689e1.pdf]

## Electronic Supplementary Information

### **Hydrogenated $\text{Cu}_2\text{O}/\text{Au}@ \text{CeO}_2$ Z-Scheme catalyst for Photocatalytic Oxidation of Amines to Imines**

Yingying Liu, Yajie Chen,\* Wei Zhou, Baojiang Jiang, Xin Zhang and Guohui Tian\*

Key Laboratory of Functional Inorganic Material Chemistry, Ministry of Education of the People's Republic of China, Heilongjiang University, 74 Xuefu Road, Harbin 150080 P. R. China

\*Corresponding author.

E-mail: tiangh@hlju.edu.cn; chenyajie1970@163.com

Total pages: 13

Total number of Fig.S: 17

Total number of Tables: 4

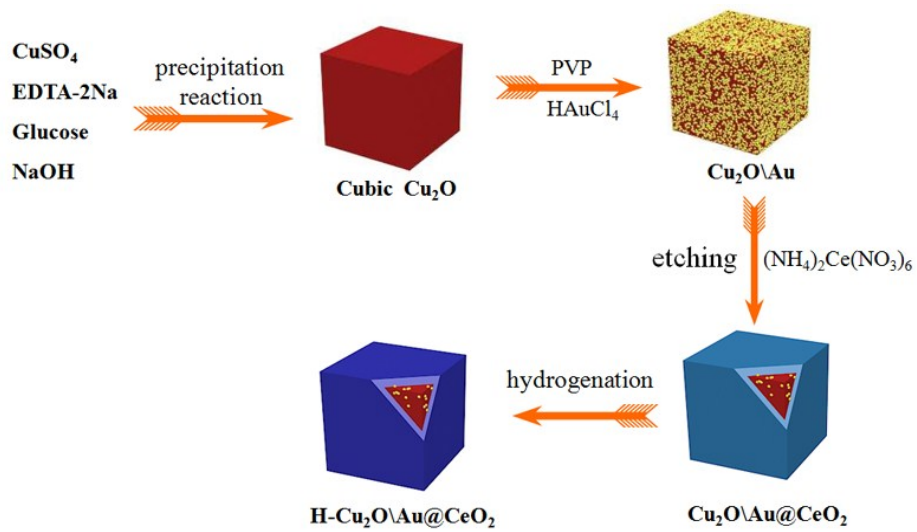

**Scheme S1.** Schematic illustration of the preparation of the hydrogenated  $\text{Cu}_2\text{O}/\text{Au}@/\text{CeO}_2$  ( $\text{H-Cu}_2\text{O}/\text{Au}@/\text{CeO}_2$ ).

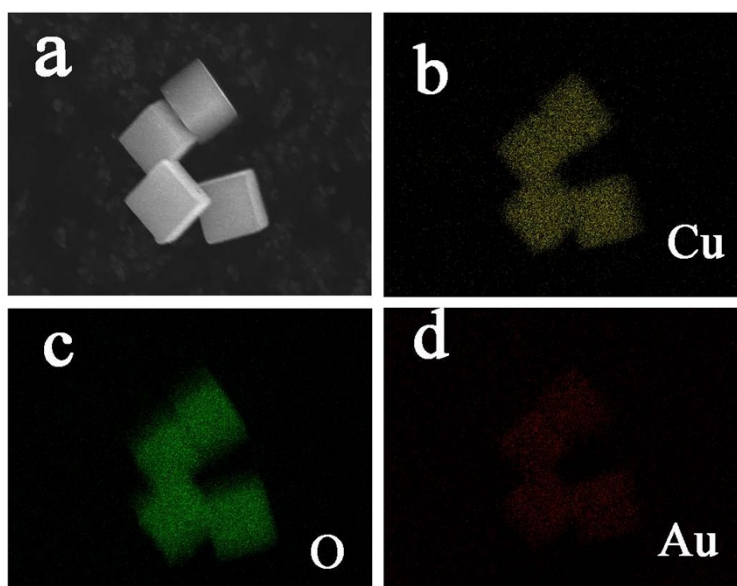

**Fig. S1.** SEM image (a) and the corresponding EDS element mapping images of the  $\text{Cu}_2\text{O}/\text{Au}$  (b-d).

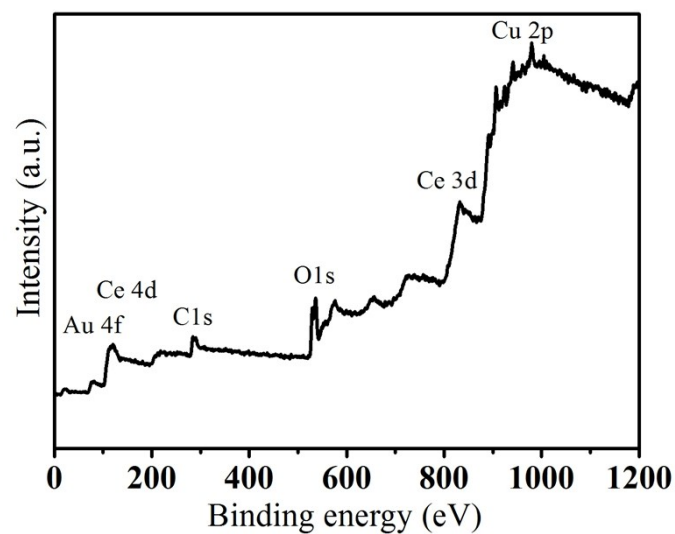

**Fig. S2.** The survey XPS spectrum of the H-Cu<sub>2</sub>O\Au@CeO<sub>2</sub> composite.

$$\text{Ce}^{3+} (\%) = [A(\text{Ce}^{3+})] / [A(\text{Ce}^{3+}) + A(\text{Ce}^{4+})] \times 100\% \quad (1)$$

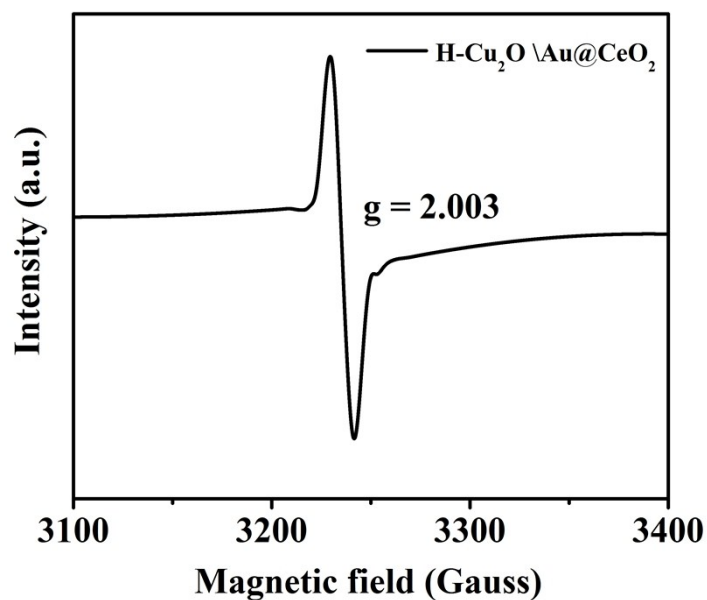

**Fig. S3.** Electron Paramagnetic Resonance Spectroscopy (ESR) of H-Cu<sub>2</sub>O\Au@CeO<sub>2</sub>.

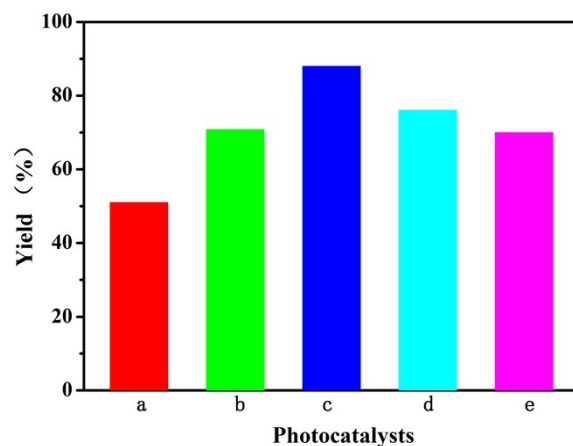

**Fig. S4.** Benzylamine yield over various H-Cu<sub>2</sub>O@Au@CeO<sub>2</sub> with the different Au contents. a) H-Cu<sub>2</sub>O@CeO<sub>2</sub>, b) H-Cu<sub>2</sub>O@Au-35@CeO<sub>2</sub>, c) H-Cu<sub>2</sub>O@Au-70@CeO<sub>2</sub> (H-Cu<sub>2</sub>O@Au@CeO<sub>2</sub>), d) H-Cu<sub>2</sub>O@Au-105@CeO<sub>2</sub>, e) H-Cu<sub>2</sub>O@Au-140@CeO<sub>2</sub>. Reaction conditions: 15 mg photocatalysts, 1.5 mL H<sub>2</sub>O, 15 uL substrates, visible light ( $\lambda > 400$  nm), illumination time is 5 h, O<sub>2</sub> atmosphere, room temperature (20-23 °C).

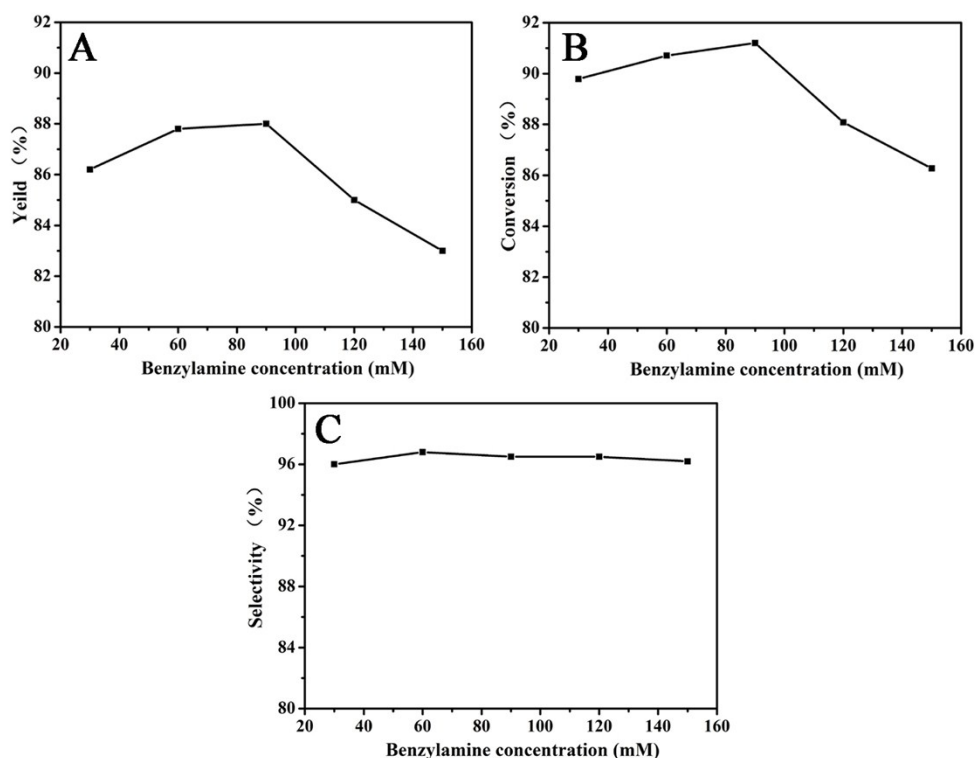

**Fig. S5.** The influence of benzylamine concentration on the yield (A), conversion (B), and selectivity (C) of H-Cu<sub>2</sub>O@Au@CeO<sub>2</sub> in the photocatalytic oxidation of benzylamine.

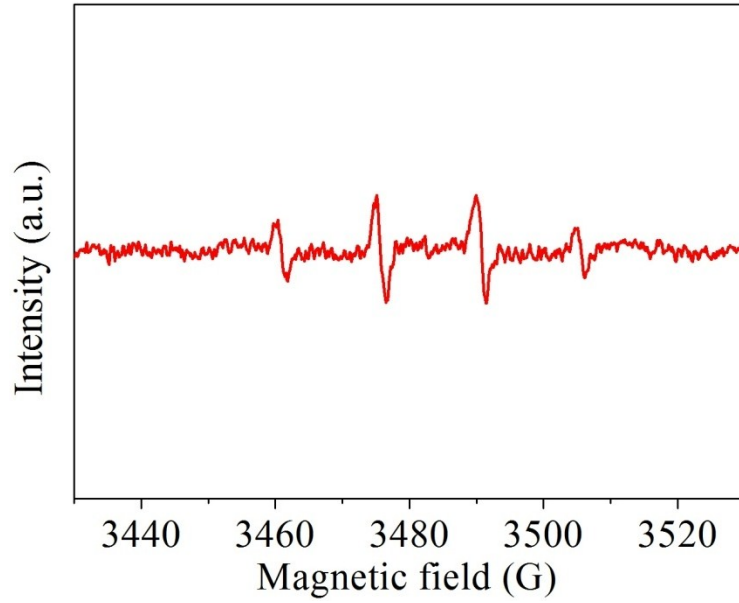

**Fig. S6.** ESR spectra of DMPO-•OH adduct in H-Cu<sub>2</sub>O/Au@CeO<sub>2</sub> aqueous dispersions with visible light irradiation.

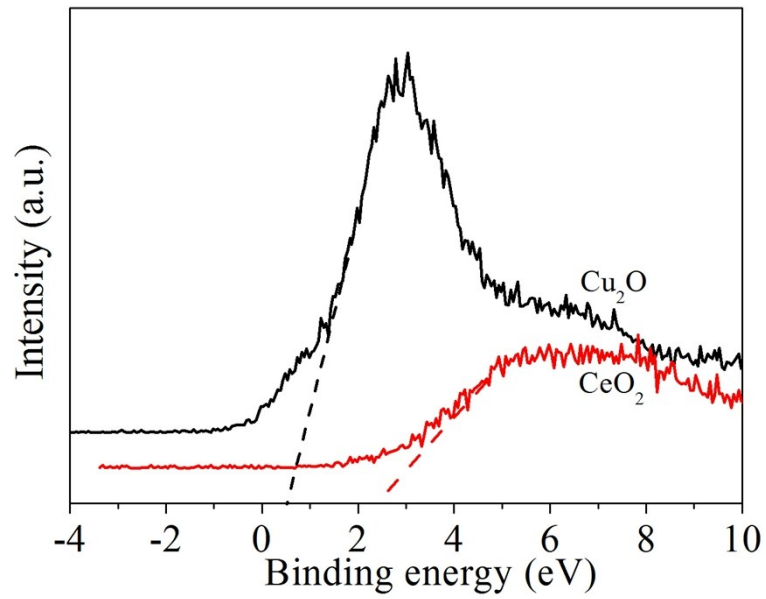

**Fig. S7.** XPS valence band spectra of different samples.

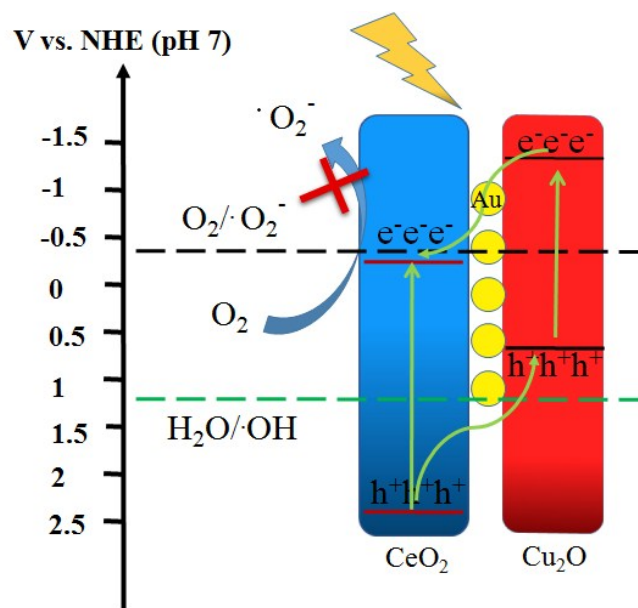

**Fig. S8.** One possible photoinduced charge transfer and separation processes for the H-Cu<sub>2</sub>O/Au@CeO<sub>2</sub> under visible-light irradiation ( $\lambda > 400$  nm).

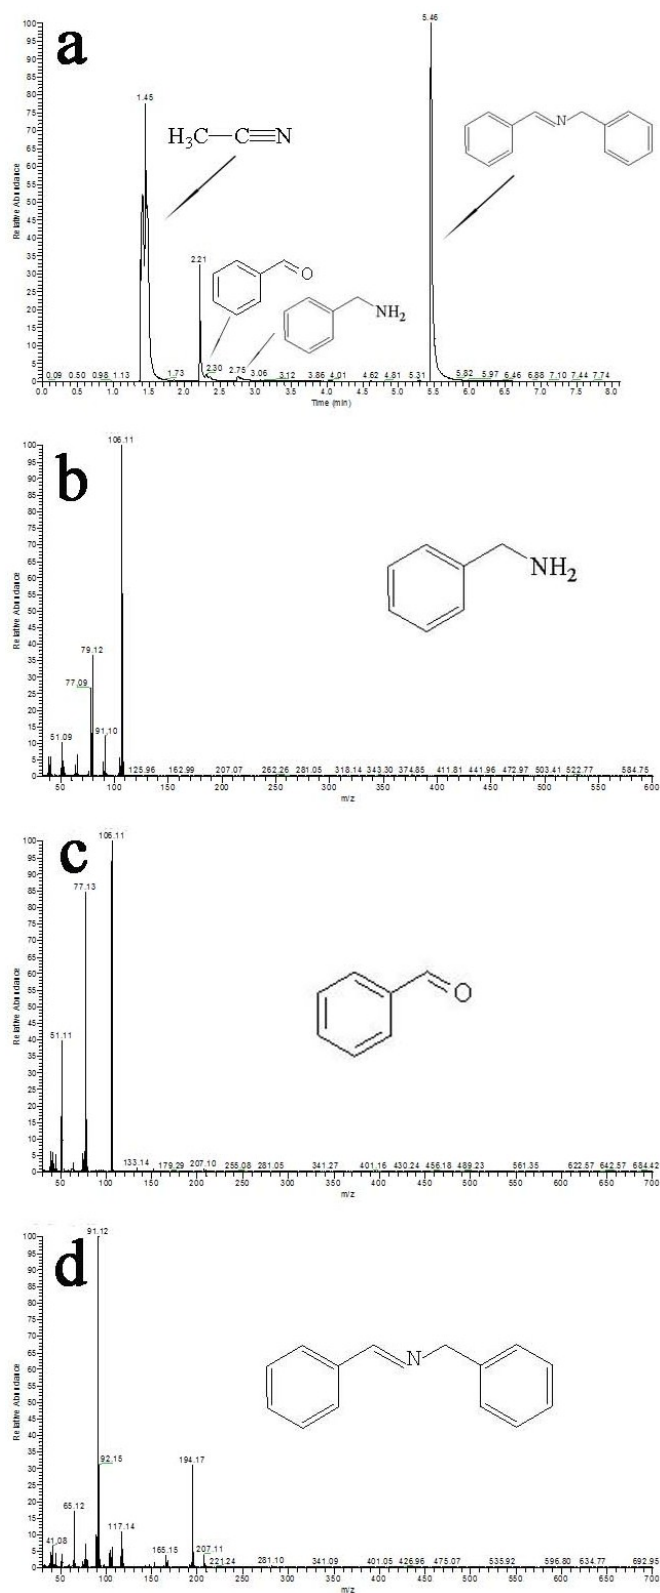

**Fig. S9.** Photocatalytic oxidation of benzyl amines over H-Cu<sub>2</sub>O/Au@CeO<sub>2</sub> under visible light irradiation (5 h) in the presence of O<sub>2</sub> and H-Cu<sub>2</sub>O/Au@CeO<sub>2</sub>. (a) gas chromatogram of products, mass spectrograms of aldehyde (b), benzylamine (c) and N-benzylidene benzylamine (d).

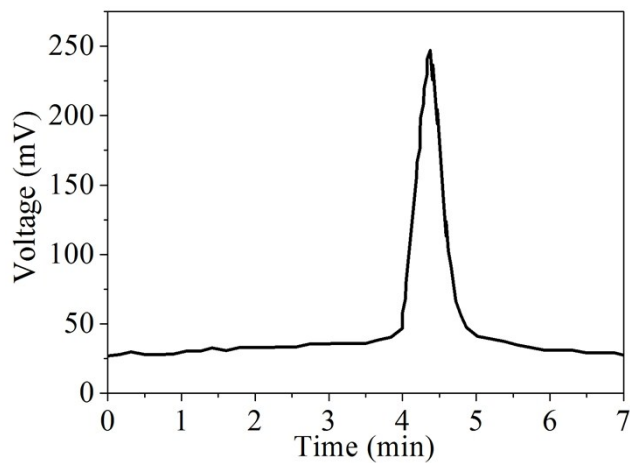

**Fig. S10.** Chromatogram of  $\text{NH}_4^+$ .

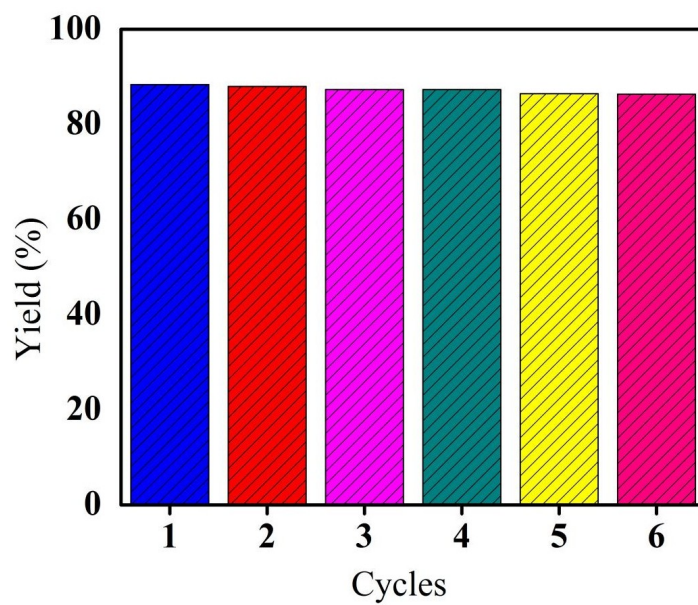

**Fig. S11.** The photocatalytic cycling stability of the  $\text{H-Cu}_2\text{O/Au@CeO}_2$  in the photocatalytic oxidation of benzylamine.



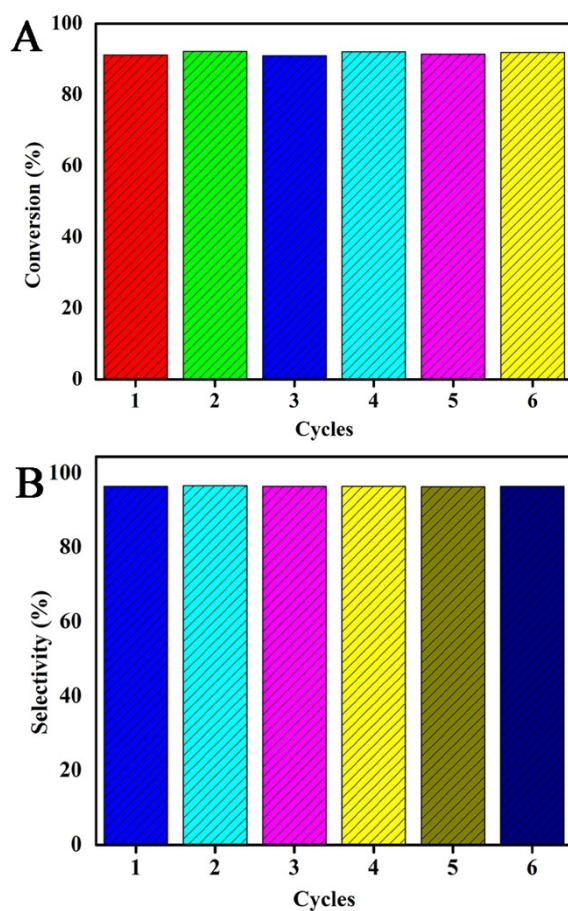

**Fig. S12.** Conversion and selectivity for the reusability test of the H-Cu<sub>2</sub>O/Au@CeO<sub>2</sub>.

**Table S1** Summary of the photoluminescence decay time ( $\tau$ ) and their relative intensities of the different samples.

| sample                                  | $\tau_1$ (ns) | $\tau_2$ (ns) | $I_1$ (%) | $I_2$ (%) | Average lifetime ( $\tau$ , ns) |
|-----------------------------------------|---------------|---------------|-----------|-----------|---------------------------------|
| H-Cu <sub>2</sub> O\Au@CeO <sub>2</sub> | 6.93          | 13.07         | 36.52     | 63.48     | 11.63                           |
| Cu <sub>2</sub> O@CeO <sub>2</sub> \Au  | 6.05          | 11.50         | 38.86     | 61.14     | 10.13                           |
| Cu <sub>2</sub> O\Au@CeO <sub>2</sub>   | 5.75          | 11.41         | 35.96     | 64.04     | 9.98                            |
| Cu <sub>2</sub> O@CeO <sub>2</sub>      | 4.50          | 10.33         | 37.27     | 62.73     | 9.10                            |
| CeO <sub>2</sub>                        | 4.14          | 7.96          | 38.98     | 61.02     | 7.01                            |

The average lifetime was calculated using equation:  $\langle\tau\rangle=(I_1\tau_1^2 + I_2\tau_2^2)/(I_1\tau_1 + I_2\tau_2)$

**Table S2** Summary of the benzylamine adsorption capacity of the different samples.

| sample                                  | adsorption capacity (%) |
|-----------------------------------------|-------------------------|
| H-Cu <sub>2</sub> O\Au@CeO <sub>2</sub> | 4.9                     |
| Cu <sub>2</sub> O@CeO <sub>2</sub> \Au  | 4.3                     |
| Cu <sub>2</sub> O\Au@CeO <sub>2</sub>   | 4.1                     |
| Cu <sub>2</sub> O@CeO <sub>2</sub>      | 3.6                     |
| CeO <sub>2</sub>                        | 3.5                     |

**Table S3.** The listing of photocatalytic oxidation of benzylamines over the catalysts of correlative references.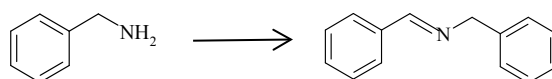

| Entry | Photocatalyst                           | Solvent                              | Conversion (%) | Selectivity (%) | Reaction time (h) | Temperature ( °C ) | Ref.      |
|-------|-----------------------------------------|--------------------------------------|----------------|-----------------|-------------------|--------------------|-----------|
| 1     | [Au <sub>25</sub> ]/TiO <sub>2</sub>    | CH <sub>3</sub> CN                   | 98             | 99              | 1.5               | 30                 | 1         |
| 2     | Au-Pd/ZrO <sub>2</sub>                  | CH <sub>3</sub> CN                   | 99             | 96              | 96                | 45                 | 2         |
| 3     | Cu/graphene                             | C <sub>2</sub> H <sub>5</sub> O<br>H | 99             | 93              | 6                 | 40                 | 3         |
| 4     | mpg-C <sub>3</sub> N <sub>4</sub>       | CH <sub>3</sub> CN                   | 99             | 99              | 3.5               | 80                 | 4         |
| 5     | Nb <sub>2</sub> O <sub>5</sub>          | C <sub>6</sub> H <sub>6</sub>        | 99             | 97              | 50                | RT                 | 5         |
| 6     | TiO <sub>2</sub>                        | CH <sub>3</sub> CN                   | 99             | 85              | 9                 | --                 | 6         |
| 7     | TiO <sub>2</sub> (Degussa P25)          | H <sub>2</sub> O                     | 81             | 63              | 9                 | RT                 | 7         |
| 8     | H-Cu <sub>2</sub> O\Au@CeO <sub>2</sub> | H <sub>2</sub> O                     | 91             | 97              | 5                 | 20                 | This work |

"--" : Not given

### References:

- 1 H. J. Chen, C. Liu, M. Wang, C. F. Zhang, N. C. Luo, Y. H. Wang, H. Abroshan, G. Li and F. Wang, *ACS Catal.*, 2017, **7**, 3632–3638.

- 2 S. Sarina, H. Y. Zhu, E. Jaatinen, Q. Xiao, H. W. Liu, J. F. Jia, C. Chen and J. Zhao, *J. Am. Chem. Soc.*, 2013, **135**, 5793–5801.
- 3 Z.-Y. Zhai, X.-N. Guo, G.-Q. Jin and X.-Y. Guo, *Catal. Sci. Technol.*, 2015, **5**, 4202–4207.
- 4 F. Z. Su, S. C. Mathew, L. Möhlmann, M. Antonietti, X. C. Wang and S. Blechert, *Angew. Chem. Int. Ed.*, 2011, **50**, 657–660.
- 5 S. Furukawa, Y. Ohno, T. Shishido, K. Teramura and T. Tanaka, *ACS Catal.*, 2011, **1**, 1150–1153.
- 6 X. J. Lang, H. W. Ji, C. C. Chen, W. H. Ma and J. C. Zhao, *Angew. Chem. Int. Ed.*, 2011, **50**, 3934–3937.
- 7 N. Li, X. J. Lang, W. H. Ma, H. W. Ji, C. C. Chen and J. C. Zhao, *Chem. Commun.*, 2013, **49**, 5034–5036.

**Table S4.** The listing of photocatalytic oxidation of aromatic alcohols over H-Cu<sub>2</sub>O/Au@CeO<sub>2</sub> under visible light irradiation. Reaction conditions: 15 mg H-Cu<sub>2</sub>O/Au@CeO<sub>2</sub>, 15  $\mu$ L of substrates, 1.5 mL toluene, O<sub>2</sub>, irradiation time is 5h.

| Entry | Substrate                                                                           | Product                                                                             | Yield (%) | Selectivity(%) |
|-------|-------------------------------------------------------------------------------------|-------------------------------------------------------------------------------------|-----------|----------------|
| 1     | 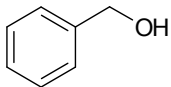 |  | 74.4      | 99.9           |
| 2     |  |  | 78.7      | 99.9           |
| 3     |  |  | 61.1      | 78.6           |
| 4     |  |  | 77.9      | 99.9           |
| 5     |  |  | 80.9      | 99.9           |

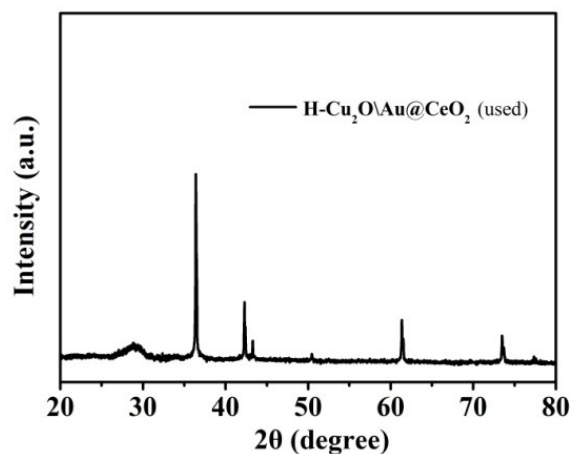

Fig. S13. The XRD patterns of H-Cu<sub>2</sub>O/Au@CeO<sub>2</sub> after test.

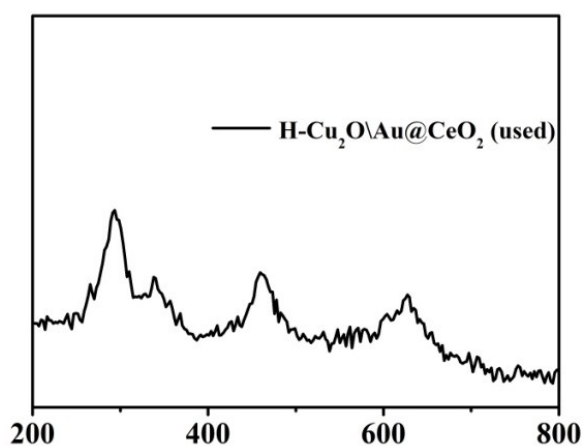

Fig. S14. The Raman spectrum of H-Cu<sub>2</sub>O/Au@CeO<sub>2</sub> after test.

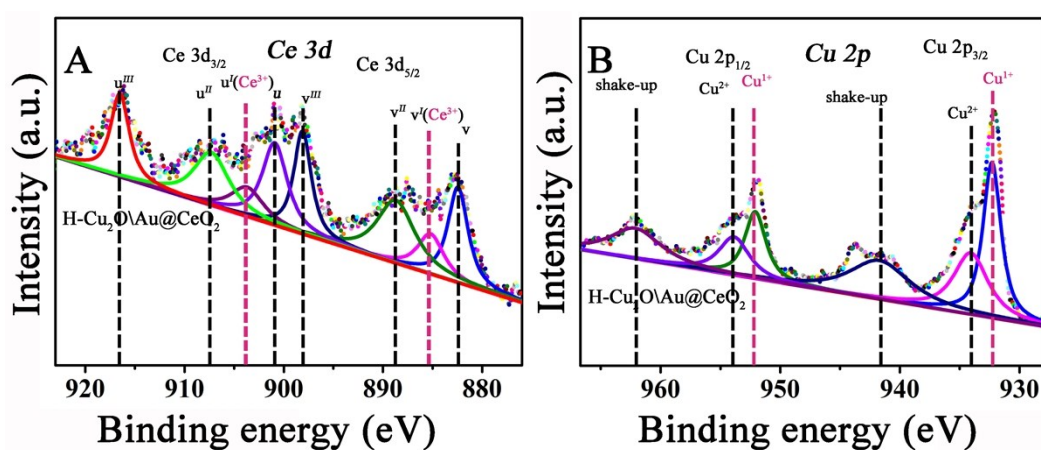

Fig. S15. XPS spectra of (A) Ce 3d, (B) Cu 2p of H-Cu<sub>2</sub>O/Au@CeO<sub>2</sub> after test.

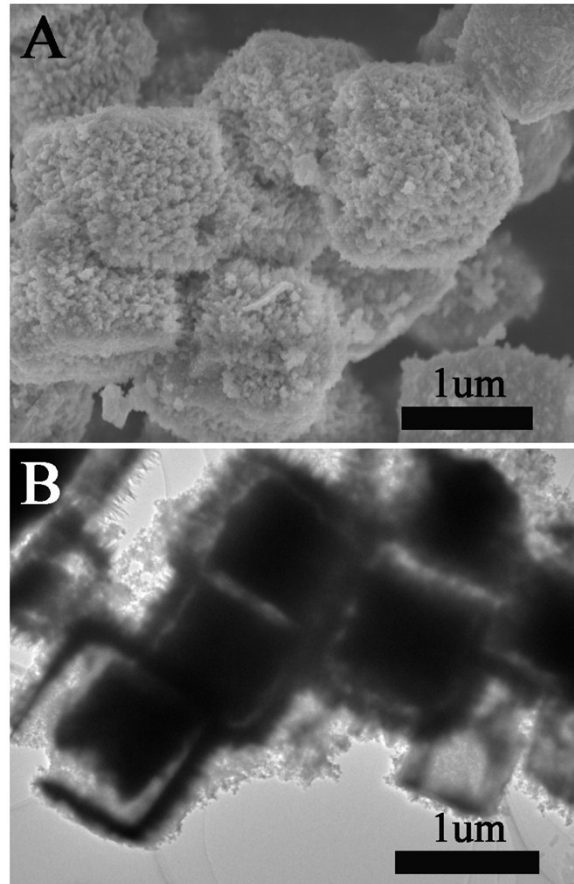

**Fig. S16.** The SEM (A) and TEM (B) images of H-Cu<sub>2</sub>O/Au@CeO<sub>2</sub> after test.
